# Supplementary material for: Performance of Cs-Doped Carbon-Based Perovskite Solar Cells in Ambient Environment
Source: MDPI journal article supplement (doi:10.3390/en16124748), 2023-06-15
Supplement: s1 [file s1]

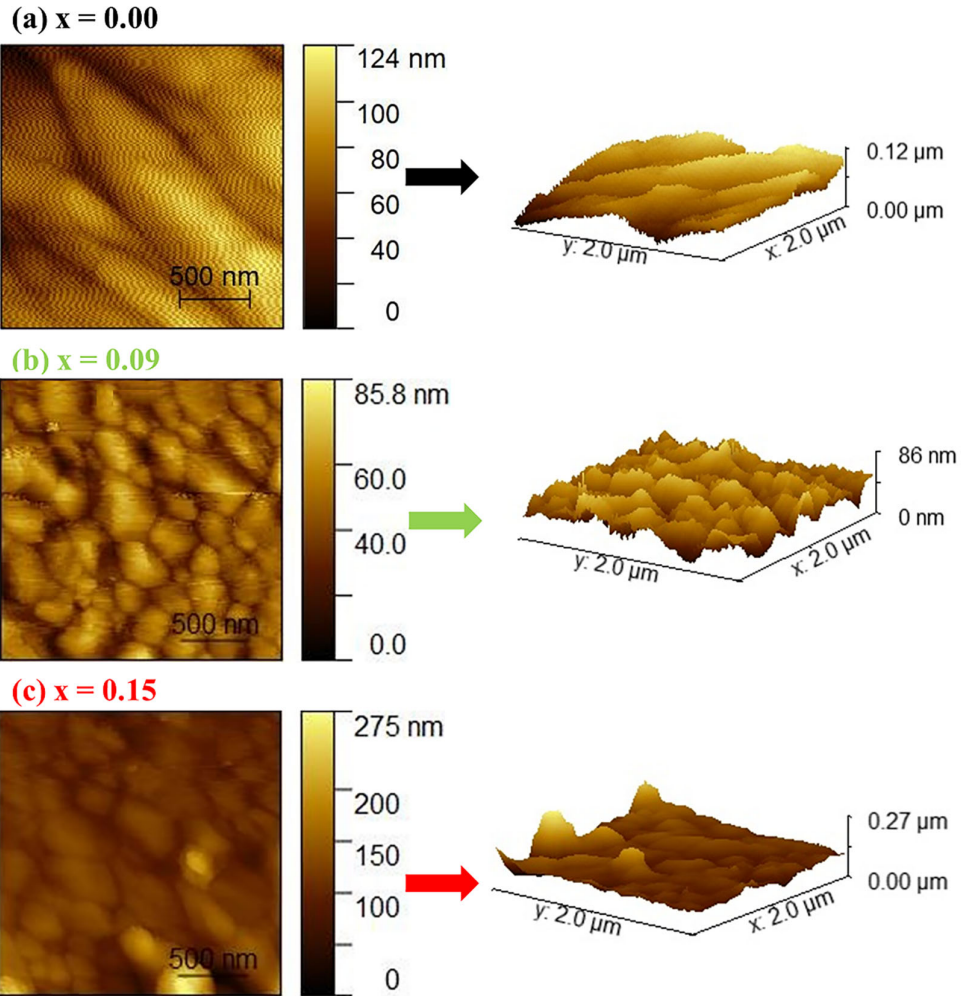

**Figure S1.** AFM 3D images and topographic maps of the perovskite films at different CsBr-doping concentrations: (a)  $x = 0.00$ , (b)  $x = 0.09$ , and (c)  $x = 0.15$ .

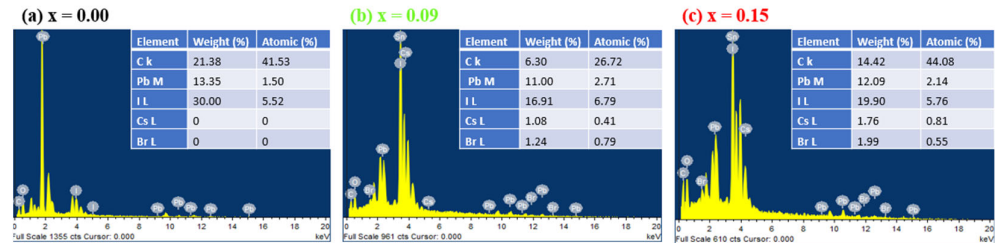

**Figure S2.** EDS mapping of the perovskite films doped with different CsBr concentrations: (a)  $x = 0.00$ , (b)  $x = 0.09$ , and (c)  $x = 0.15$ .

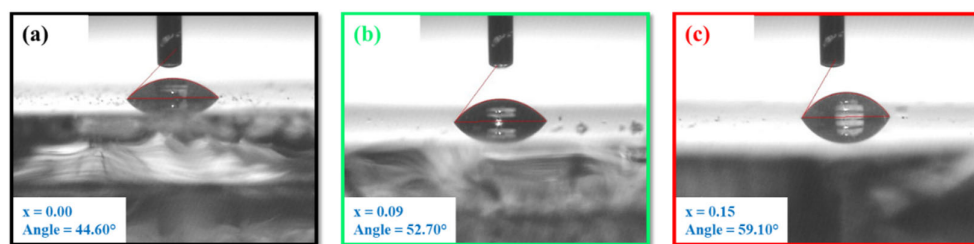

**Figure S3.** Water contact angle of perovskite absorber layers doped with the three different CsBr-doping concentrations of (a)  $x = 0.00$ , (b)  $x = 0.09$  and (c)  $x = 0.15$  in the absence of carbon CE.
